# Supplementary material for: Boosting the growth and aggregation of sulfide nanoparticlesviaregulating heterogeneous nucleation for enhanced sedimentation
Source: Royal Society of Chemistry journal article supplement (doi:10.1039/d2en01001a), 2022-12-28
Supplement: d2en01001a1.pdf [file d2en01001a1.pdf]

## Supporting Information

### **Boosting the growth and aggregation of sulfide nanoparticles via regulating heterogenous nucleation for enhanced sedimentation**

Chunxue Li <sup>a</sup>, Wenchao Zhang <sup>ab</sup>, Jiahui Wu <sup>a</sup>, Junqin Liu <sup>a</sup>, Han Wang <sup>a</sup>, Qingzhu Li <sup>ab</sup>, Liyuan Chai <sup>ab</sup>, Qingwei Wang<sup>\*ab</sup>, Zhang Lin <sup>ab</sup>

<sup>a</sup> School of Metallurgy and Environment, Central South University, Changsha 410083, China

<sup>b</sup> Chinese National Engineering Research Center for Control and Treatment of Heavy Metal Pollution, Changsha 410083, China

\*Corresponding author:

Qingwei Wang

Tel:15116211257

E-mail: qw\_wang@csu.edu.cn

## List of figures and tables

**Fig.S1.** Schematic diagram of experimental apparatus

**Fig.S2.** The size of CuS primary particles at 0g/L crystal seed dosage or 0rpm stirring rate.

**Fig.S3.** The CuS supernatant optical microscope picture (a)without stirring and seeding, (b)stirring and seeding.

**Fig.S4.** (a)The TEM and HR-TEM images, (b)The XRD patterns of CuS for none, only stirring, only seeding, stirring and seeding.

**Fig.S5.** TEM images of CuS particles at different volumes of seeds (a) without stirring, (b)stirring.

**Fig.S6.** TEM images of CuS nucleation growth (a)15min with stirring and (b) 30min without stirring.

**Fig.S7.** The optical micrographs of CuS of none, stirring only, seeding only, stirring and seeding.

**Fig.S8.** High-resolution XPS spectra of (a) none, (b) stirring only, (c) seeding only, (d) stirring and seeding.

**Fig.S9.** The contact angle of particles produced with and without stirring at the same crystal seed volume.

**Fig.S10.** Size of CuS particles produced at different H<sub>2</sub>S concentrations as a function of time (a)stirring,(b)without stirring.

**Table S1.** Data used for calculation of total potential of interaction between hydrophobic particles.

**Table S2.** Calculation results of total potential of interaction between hydrophobic hematite particles.

**Fig.S1**

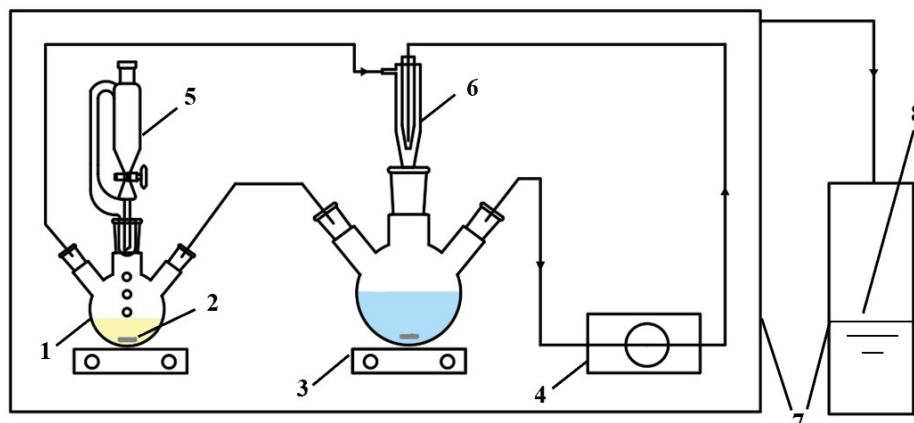

**Fig.S1.** Schematic diagram of experimental apparatus (1-Gas generating bottle; 2-Magnetic stirring sub; 3-Magnetic stirrer; 4-Peristaltic pump; 5-Separating funnel; 6-Reactor; 7-Exhaust gas adsorption device; 8-NaOH absorbing solution).

**Fig.S2**

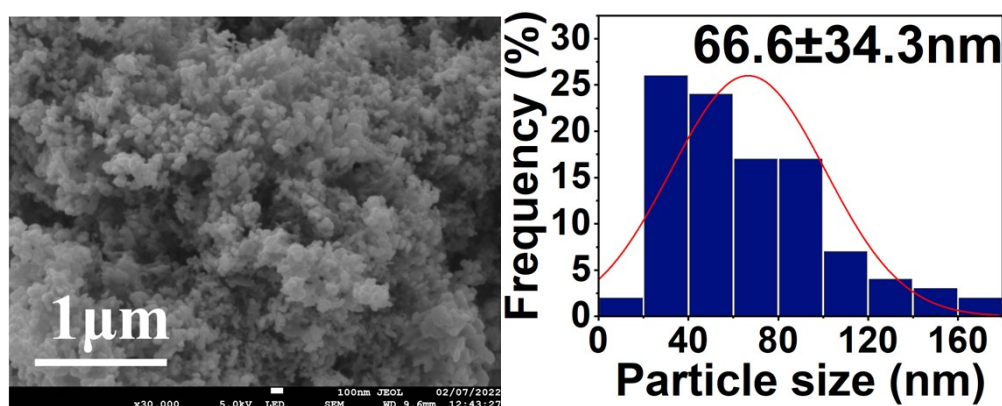

**Fig.S2.** The size of CuS primary particles at 0g/L crystal seed dosage or 0rpm stirring rate

**Fig.S3**

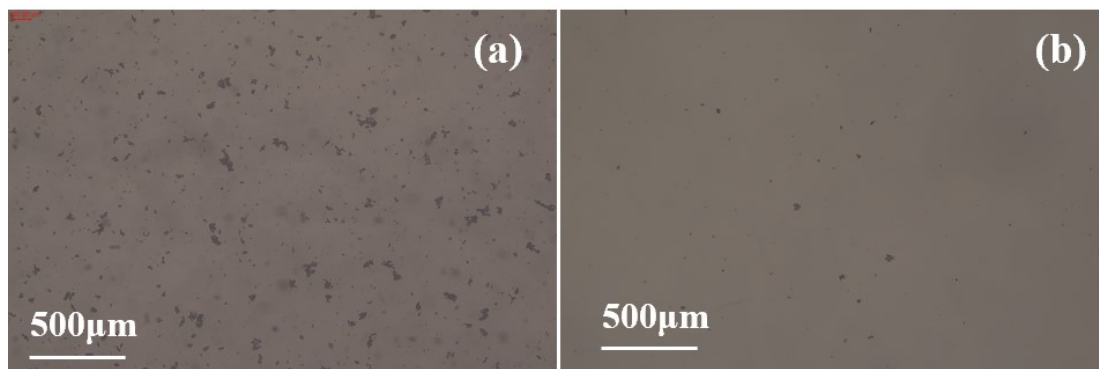

**Fig.S3.** The CuS supernatant optical microscope picture (a)without stirring and seeding, (b)stirring and seeding.

**Fig.S4**

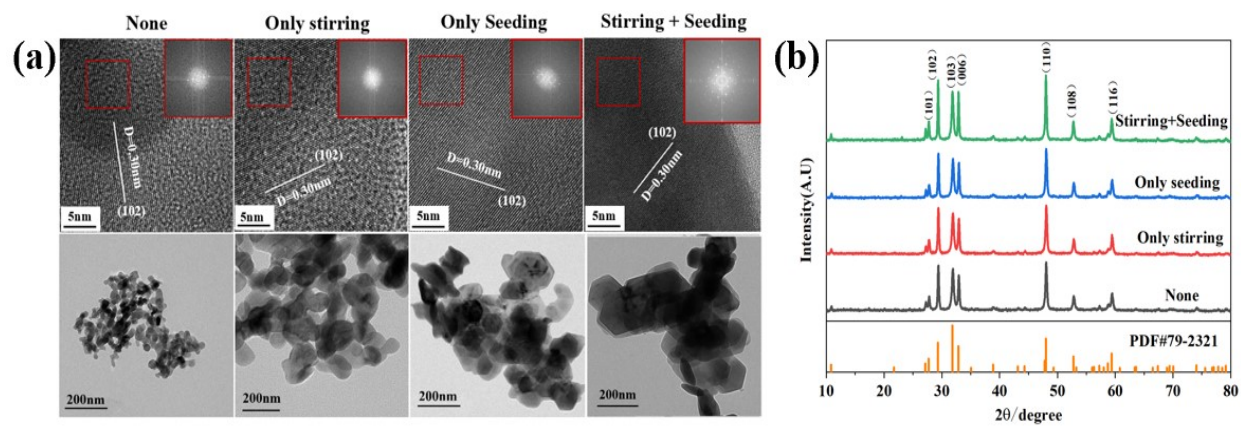

**Fig.S4.** (a)The TEM and HR-TEM images (b)The XRD patterns of CuS for none, only stirring, only seeding, stirring and seeding.

**Fig.S5**

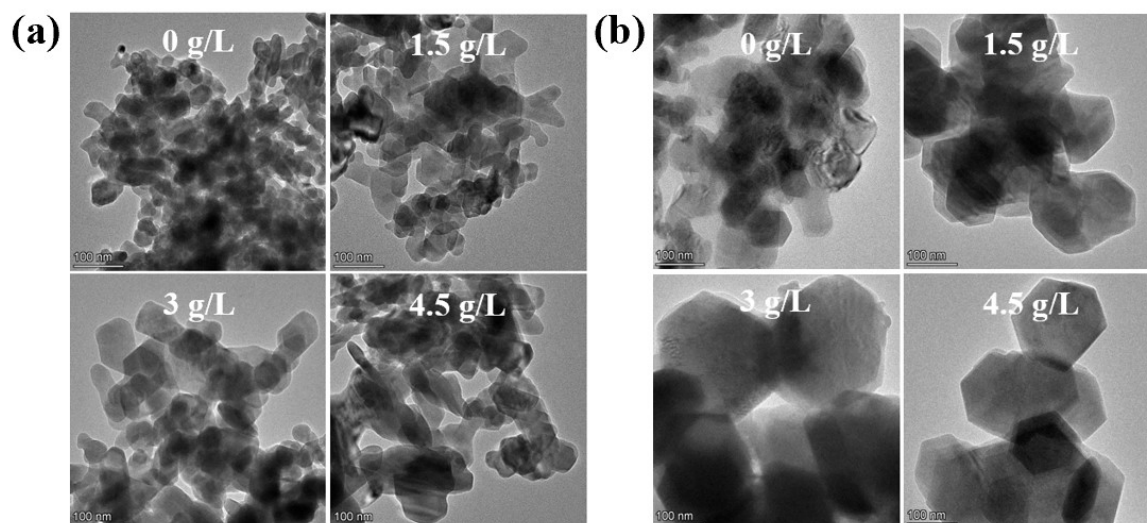

**Fig.S5.** TEM images of CuS particles at different volumes of seeds (a) without stirring, (b) stirring.

**Fig.S6**

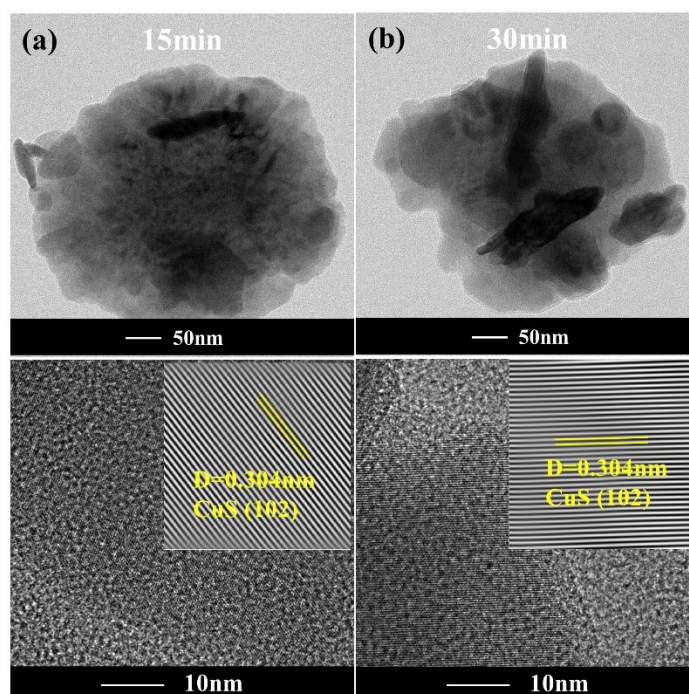

**Fig.S6.** TEM images of CuS nucleation growth (a) 15min with stirring and (b) 30min without stirring.

**Fig.S7**

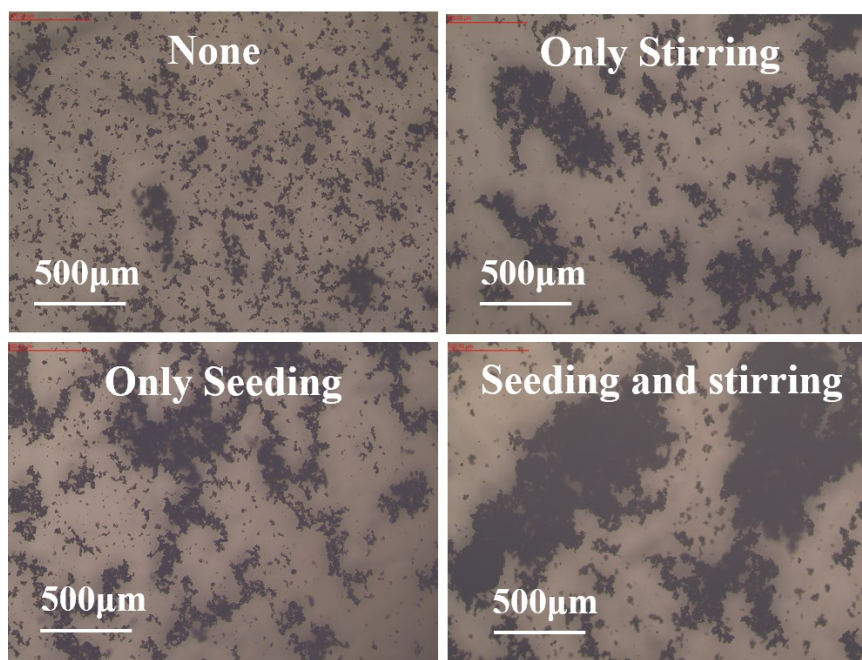

**Fig.S7.** The optical micrographs of CuS of none, stirring only, seeding only, stirring and seeding.

**Fig.S8**

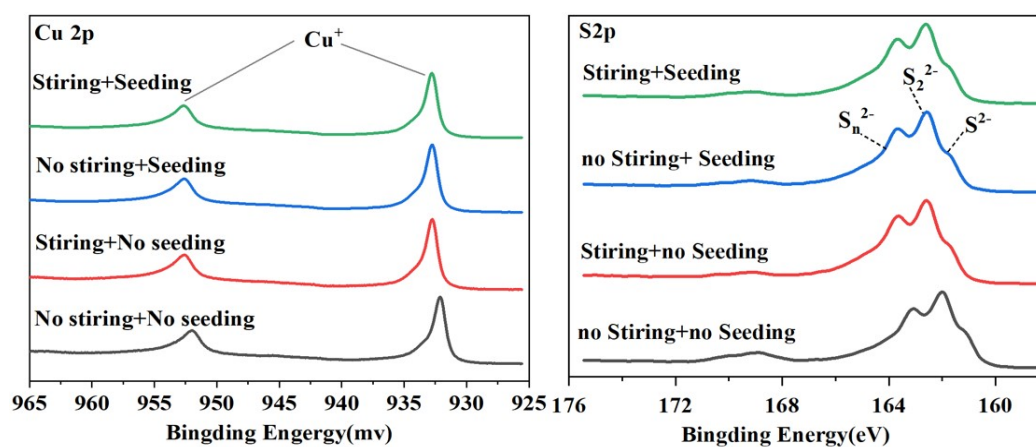

**Fig.S8.** High-resolution XPS spectra of (a) none, (b) stirring only, (c) seeding only, (d) stirring and seeding.

**Fig.S9**

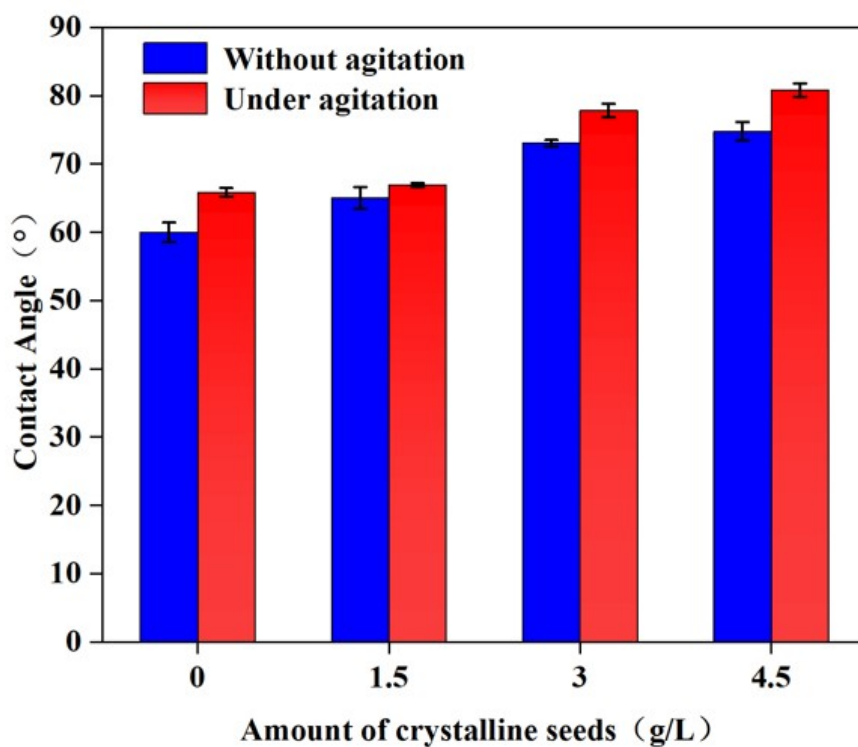

**Fig.S9.** The contact angle of particles produced with and without stirring at the same crystal seed volume.

**Fig.S10**

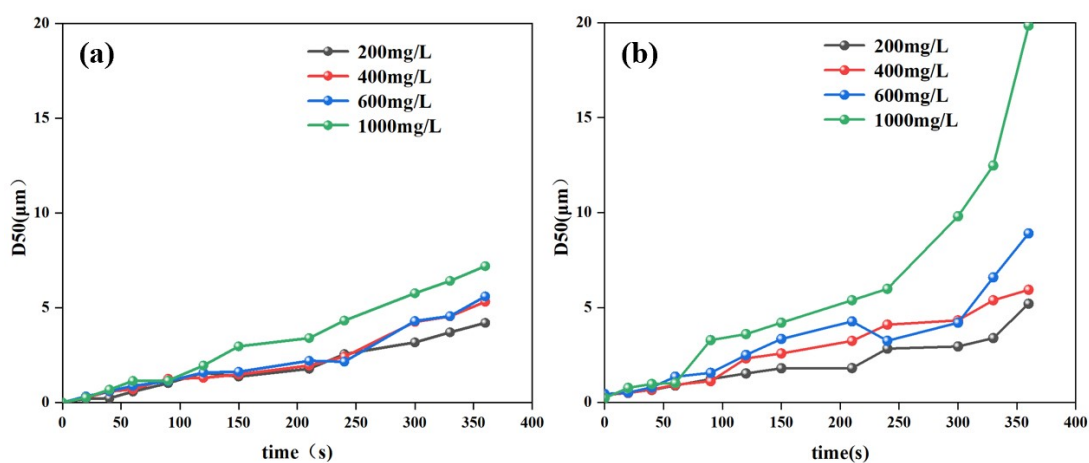

**Fig.S10.** Size of CuS particles produced at different H<sub>2</sub>S concentrations as a function of time (a)stirring,(b)without stirring.



## Calculation of total potential of interaction between hydrophobic particles

Based on the extended DLVO theory(Yin et al., 2011), the total interaction force between hydrophobic particles is calculated. (1)

$$U_T=U_A+U_R+U_{HI}$$

where  $U_T$  is the total potential of interaction between hydrophobic particles;  $U_A$  is van der Waals attractive potential;  $U_R$  is electric double layer repulsion interaction potential;  $U_{HI}$  is hydrophobic interaction potential;

For two spherical particles ,the van der Waals attractive potential between them is

$$U_A = \frac{Ar}{12H} \quad (2)$$

Where  $r$  is radius of the particle;  $A$  is Hamaker or the material characteristic constant;  $H$  is the shortest distance between particles.

Eq.(2) is suitable for the case of the sizes of particle being much larger than their distance.

Hamaker constant is determinant for  $U_A$  and can be calculated by

$$A=\pi^2c\rho^2=\pi^2\rho^2 \frac{3\alpha_0^2h_0v}{4(4\pi\epsilon_0)^2} \quad (3)$$

Where  $\rho$  is the density of the particles,  $\text{kg/m}^3$ ;  $c$  is the dispersive interaction energy;  $\alpha_0$  is the atomic polarisation rate,  $\text{c}^2\text{m}^2/\text{J}$ ;  $h_0$  is Plank constant,  $6.62 \times 10^{-34}$ ;  $v$  is electronic rotation frequency.

For spherical particles, when the distance between the particles is greater than the thickness of the double layer of electricity, the repulsive interaction potential is

$$U_R = \frac{1}{2} \epsilon r \Phi_0^2 \ln [\exp(-\kappa H)] \quad (4)$$

where  $r$  is radius of particles,  $m$ ;  $k$  is Boltzmann constant,  $1.38 \times 10^{-23}$  J/K;  $\Phi_0$  is surface potential of particles, V;  $\epsilon$  is permittivity of solution, F/m;  $\kappa$  is thickness of electric double layer,  $m^{-1}$ .

$$\kappa = \left( \frac{8\pi e^2 n Z^2}{\epsilon k T} \right)^{1/2} \quad (5)$$

The empirical equation for the hydrophobic force is as follow (Pascoe and Doherty, 1997):

$$U_{HI} = -C r h_0 \exp\left(-\frac{H}{H_0}\right) \quad (6)$$

where  $C$  is constant, N/m,  $C = 2.51 \times 10^{-3} k_1$  ( $k_1$  is hydrophobic coefficient, related to contact angle  $\theta$ ,  $k_1 = \frac{\exp(\theta/100) - 1}{e - 1}$ );  $H_0$  is attenuation length, m.

**Table S1.** Data used for calculation of total potential of interaction between hydrophobic particles.

| <b>Parameter</b>                                                 | <b>Value</b>           |
|------------------------------------------------------------------|------------------------|
| <b>Absolute temperature/K</b>                                    | 293                    |
| <b>Hamaker constant, A/J</b>                                     | $1.01 \times 10^{-20}$ |
| <b>Mean particle radius, r/m</b>                                 | $2.72 \times 10^{-6}$  |
| <b>Zeta potential of particle surface, <math>\phi_0/V</math></b> | $-36.3 \times 10^{-3}$ |
| <b>Debye constant, <math>\kappa/m^{-1}</math></b>                | $3 \times 10^7$        |
| <b>Constant, C/(N·m<sup>-1</sup>)</b>                            | $14.8 \times 10^{-4}$  |
| <b>Attenuation length, <math>h_0/m</math></b>                    | $5.1 \times 10^{-9}$   |

**Table S2.** Calculation results of total potential of interaction between hydrophobic hematite particles.

| <b>H/nm</b> | <b>UA/<br/>10<sup>-19</sup>J</b> | <b>UR/<br/>10<sup>-19</sup>J</b> | <b>UHI/<br/>10<sup>-19</sup>J</b> | <b>UT/<br/>10<sup>-19</sup>J</b> |
|-------------|----------------------------------|----------------------------------|-----------------------------------|----------------------------------|
| 1.0         | -20.48                           | 7.46                             | -168.75                           | -181.77                          |
| 1.3         | -15.59                           | 7.42                             | -159.11                           | -167.28                          |
| 2.0         | -10.13                           | 7.32                             | -138.49                           | -141.30                          |
| 2.6         | -7.78                            | 7.21                             | -123.12                           | -123.69                          |
| 4.0         | -4.98                            | 6.99                             | -93.56                            | -91.55                           |
| 6.0         | -3.37                            | 6.68                             | -63.21                            | -59.9                            |
| 10.0        | -2.03                            | 6.11                             | -28.86                            | -24.78                           |
| 20.0        | -1.01                            | 4.82                             | -4.05                             | -0.24                            |
| 30.0        | -0.67                            | 3.75                             | -0.57                             | 2.51                             |
| 50.0        | -0.42                            | 2.22                             | 0.01                              | 1.8                              |
| 100.0       | -0.20                            | 0.53                             | 0                                 | 0.33                             |
